# Supplementary material for: Discovery of novel antifungal resorcylate aminopyrazole Hsp90 inhibitors based on structural optimization by molecular simulations
Source: Royal Society of Chemistry journal article supplement (doi:10.1039/d1nj04927e), 2022-01-01
Supplement: d1nj04927e1.pdf [file d1nj04927e1.pdf]

# Supporting materials

## Discovery of Novel Antifungal Resorcylate Aminopyrazole Hsp90 Inhibitors Based on Structural Optimization by Molecular Simulation

YanTuo<sup>a</sup>, Guangping Li<sup>a</sup>, Zhou Liu<sup>a</sup>, Na Yu<sup>a</sup>, Yuepeng Li<sup>a</sup>, Li Yang<sup>a</sup>, Haibin Liu<sup>b,\*</sup>,

Yuanqiang Wang<sup>a,c,d,e,\*</sup>

a.School of Pharmacy and Bioengineering, Chongqing University of Technology, Chongqing 400054, China. Email: wangyqnn@cqut.edu.cn

b.National Engineering Research Center for Gelatin-based Traditional Chinese Medicine,Dong-E-E-Jiao Co. Ltd. Shandong Province, China, 252201.

c.Chongqing Key Laboratory of Medicinal Chemistry & Molecular Pharmacology, Chongqing University of Technology, Chongqing, China, 400054.

d.Chongqing Key Laboratory of Target Based Drug Screening and Activity Evaluation, Chongqing University of Technology, Chongqing, China, 400054.

e.State Key Laboratory of Silkworm Genome Biology, Southwest University, Chongqing, China, 400716

### New Journal of Chemistry

**Table S1** Experimental and predicted activity values of compounds

| No. | Structure |                |                | pEC <sub>50</sub> |      |       | CoMFA |       | CoMSIA |  |
|-----|-----------|----------------|----------------|-------------------|------|-------|-------|-------|--------|--|
|     | X         | R <sub>1</sub> | R <sub>2</sub> | R <sub>3</sub>    | Obs. | Pred. | Err%. | Pred. | Err%.  |  |

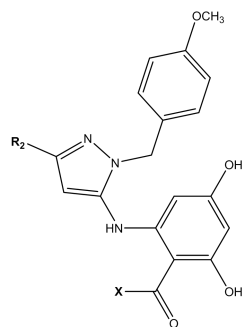

|    |  |                 |       |       |       |       |       |
|----|--|-----------------|-------|-------|-------|-------|-------|
| 1  |  | Ph              | 6.292 | 6.516 | 3.560 | 6.510 | 3.465 |
| 2  |  | CH <sub>3</sub> | 6.735 | 6.537 | 2.940 | 6.651 | 1.247 |
| 3  |  | CH <sub>3</sub> | 6.804 | 7.009 | 3.013 | 6.962 | 2.322 |
| 4  |  | Ph              | 7.201 | 6.856 | 4.791 | 6.842 | 4.985 |
| 5* |  | CH <sub>3</sub> | 6.932 | 6.694 | 3.433 | 7.185 | 3.650 |
| 6  |  | CH <sub>3</sub> | 7.268 | 7.141 | 1.747 | 7.094 | 2.394 |
| 7  |  | Ph              | 5.982 | 6.389 | 6.804 | 6.374 | 6.553 |
| 8  |  | Ph              | 7.638 | 7.695 | 0.746 | 7.928 | 3.797 |
| 9  |  | Ph              | 7.854 | 7.864 | 0.127 | 7.835 | 0.242 |
| 10 |  | CH <sub>3</sub> | 6.845 | 6.890 | 0.657 | 6.858 | 0.190 |
| 11 |  | Ph              | 6.550 | 6.551 | 0.015 | 6.450 | 1.527 |

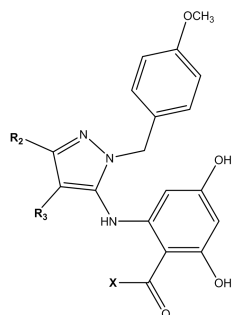

Amide substitution("X"):

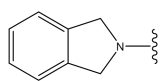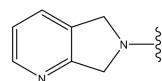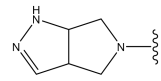

|     |   |                                                                                     |                 |       |       |            |       |       |
|-----|---|-------------------------------------------------------------------------------------|-----------------|-------|-------|------------|-------|-------|
| 12  | A | H                                                                                   | H               | 7.387 | 7.144 | 3.290      | 7.092 | 3.994 |
| 13* | A | H                                                                                   | CH <sub>3</sub> | 7.658 | 7.447 | 2.755      | 6.900 | 9.898 |
| 14  | A | H                                                                                   | iPr             | 6.833 | 6.817 | 0.234      | 6.797 | 0.527 |
| 15* | A | H                                                                                   | Bn              | 6.333 | 7.233 | 14.21<br>1 | 6.916 | 9.206 |
| 16* | B | Et                                                                                  | H               | 7.854 | 8.020 | 2.114      | 8.115 | 3.323 |
| 17  | C | Et                                                                                  | H               | 7.921 | 7.971 | 0.631      | 8.031 | 1.389 |
| 18  | B | iPr                                                                                 | H               | 7.886 | 7.877 | 0.114      | 7.778 | 1.370 |
| 19* | C | iPr                                                                                 | H               | 8.046 | 8.077 | 0.385      | 8.063 | 0.211 |
| 20  | B |  | H               | 7.854 | 8.042 | 2.394      | 8.186 | 4.227 |
| 21  | C |  | H               | 7.854 | 8.002 | 1.884      | 8.134 | 3.565 |
| 22  | B |  | H               | 8.222 | 8.027 | 2.372      | 7.758 | 5.643 |

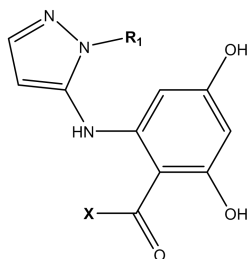

Amide substitution("X"):

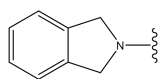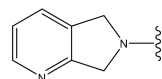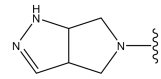

|     |   |                                                                                     |       |       |       |       |       |
|-----|---|-------------------------------------------------------------------------------------|-------|-------|-------|-------|-------|
| 23  | A | CH <sub>3</sub>                                                                     | 6.955 | 6.768 | 2.689 | 6.913 | 0.604 |
| 24  | B | CH <sub>3</sub>                                                                     | 6.205 | 6.460 | 4.110 | 6.554 | 5.624 |
| 25  | C | CH <sub>3</sub>                                                                     | 6.424 | 6.468 | 0.685 | 6.536 | 1.743 |
| 26  | A | <sup>i</sup> Pr                                                                     | 7.119 | 7.079 | 0.562 | 7.120 | 0.014 |
| 27  | A | <sup>i</sup> Bu                                                                     | 7.456 | 7.426 | 0.402 | 7.513 | 0.764 |
| 28  | B | <sup>i</sup> Bu                                                                     | 6.932 | 7.129 | 2.842 | 7.182 | 3.606 |
| 29  | A |    | 8.046 | 7.831 | 2.672 | 7.895 | 1.877 |
| 30  | B |    | 7.824 | 7.936 | 1.431 | 8.053 | 2.927 |
| 31  | C |   | 8.097 | 8.093 | 0.049 | 8.086 | 0.136 |
| 32  | A | Ph                                                                                  | 7.854 | 7.934 | 1.019 | 7.629 | 2.865 |
| 33  | B | Ph                                                                                  | 7.678 | 7.627 | 0.664 | 7.498 | 2.344 |
| 34  | C | Ph                                                                                  | 7.824 | 7.740 | 0.818 | 7.532 | 3.732 |
| 35  | A | Cy                                                                                  | 7.886 | 7.876 | 0.127 | 7.610 | 3.500 |
| 36* | B | Cy                                                                                  | 7.796 | 7.876 | 1.026 | 7.673 | 1.578 |
| 37* | C | Cy                                                                                  | 7.854 | 8.173 | 4.062 | 7.878 | 0.306 |
| 38  | A | Bn                                                                                  | 7.824 | 7.654 | 2.173 | 7.692 | 1.687 |
| 39  | B | Bn                                                                                  | 7.745 | 7.761 | 0.207 | 7.850 | 1.356 |
| 40  | A |  | 7.387 | 7.428 | 0.555 | 7.606 | 2.965 |
| 41  | B |  | 6.845 | 6.809 | 0.526 | 6.822 | 0.336 |

|     |   |                                                                                    |  |       |       |       |       |       |
|-----|---|------------------------------------------------------------------------------------|--|-------|-------|-------|-------|-------|
| 42  | A |   |  | 7.481 | 7.522 | 0.548 | 7.532 | 0.655 |
| 43  | B |   |  | 7.097 | 7.133 | 0.507 | 6.941 | 2.198 |
| 44* | C |   |  | 7.387 | 7.780 | 5.320 | 7.721 | 4.521 |
| 45  | B |   |  | 7.921 | 8.008 | 1.098 | 7.716 | 2.588 |
| 46* | C |   |  | 7.921 | 7.957 | 0.454 | 7.707 | 2.702 |
| 47  | B |   |  | 7.602 | 7.599 | 0.039 | 7.456 | 1.921 |
| 48  | C |  |  | 7.678 | 7.826 | 1.928 | 7.772 | 1.224 |

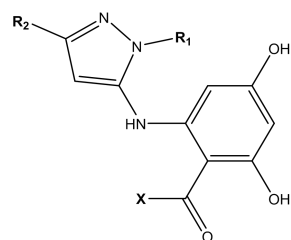

Amide substitution ("X"):

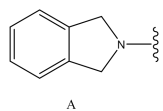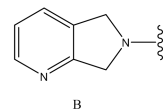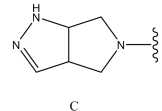

|    |   |                                                                                     |                 |       |       |       |       |       |
|----|---|-------------------------------------------------------------------------------------|-----------------|-------|-------|-------|-------|-------|
| 49 | A |  | CH <sub>3</sub> | 6.917 | 6.910 | 0.101 | 6.754 | 2.357 |
| 50 | A |  | CH <sub>3</sub> | 6.936 | 6.943 | 0.101 | 7.221 | 4.109 |
| 51 | A |  | CH <sub>3</sub> | 6.873 | 6.839 | 0.495 | 7.017 | 2.095 |
| 52 | A | CH <sub>3</sub>                                                                     | Ph              | 6.484 | 6.260 | 3.455 | 6.500 | 0.247 |
| 53 | B | CH <sub>3</sub>                                                                     | Ph              | 6.403 | 6.303 | 1.562 | 6.415 | 0.203 |

|     |   |                                                                                   |    |       |       |       |       |       |
|-----|---|-----------------------------------------------------------------------------------|----|-------|-------|-------|-------|-------|
| 54* | C | CH <sub>3</sub>                                                                   | Ph | 6.672 | 6.502 | 2.548 | 6.695 | 0.345 |
| 55* | B | <sup>t</sup> Bu                                                                   | Ph | 6.421 | 6.650 | 3.566 | 6.560 | 2.165 |
| 56  | C | <sup>t</sup> Bu                                                                   | Ph | 6.740 | 6.687 | 0.786 | 6.931 | 2.834 |
| 57* | C |  | Ph | 7.469 | 7.354 | 1.540 | 7.281 | 2.517 |
| 58  | C | <sup>t</sup> Bu                                                                   | Ph | 7.155 | 7.019 | 1.901 | 6.910 | 3.424 |

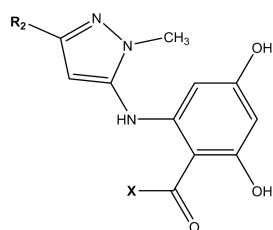

Amide substitution("X"):

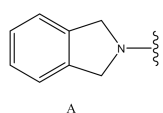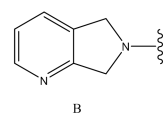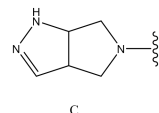

|     |   |                                                                                     |                 |       |       |       |       |       |
|-----|---|-------------------------------------------------------------------------------------|-----------------|-------|-------|-------|-------|-------|
| 59* | B |                                                                                     | <sup>i</sup> Pr | 6.807 | 6.846 | 0.573 | 6.579 | 3.349 |
| 60  | C |                                                                                     | <sup>i</sup> Pr | 7.027 | 7.014 | 0.185 | 7.049 | 0.313 |
| 61* | C |                                                                                     | Cy              | 7.018 | 7.087 | 0.983 | 7.091 | 1.040 |
| 62* | A |  |                 | 6.223 | 6.337 | 1.832 | 6.378 | 2.491 |
| 63  | B |  |                 | 6.100 | 6.043 | 0.934 | 6.046 | 0.885 |
| 64  | C |  |                 | 6.400 | 6.498 | 1.531 | 6.357 | 0.672 |
| 65  | A |  |                 | 6.242 | 6.214 | 0.449 | 6.367 | 2.003 |
| 66  | B |  |                 | 5.987 | 5.925 | 1.036 | 6.035 | 0.802 |
| 67  | C |  |                 | 6.402 | 6.298 | 1.624 | 6.151 | 3.921 |

|     |   |                                                                                     |       |       |       |       |       |
|-----|---|-------------------------------------------------------------------------------------|-------|-------|-------|-------|-------|
| 68  | A | 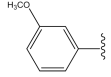   | 5.785 | 5.591 | 3.354 | 5.442 | 5.929 |
| 69  | B |    | 5.301 | 5.612 | 5.867 | 5.594 | 5.527 |
| 70  | C |    | 5.726 | 5.796 | 1.222 | 5.869 | 2.497 |
| 71  | B |    | 6.226 | 6.195 | 0.498 | 6.259 | 0.530 |
| 72  | C |    | 6.532 | 6.649 | 1.791 | 6.571 | 0.597 |
| 73  | A |    | 5.972 | 5.995 | 0.385 | 6.223 | 4.203 |
| 74* | B |   | 5.750 | 5.710 | 0.696 | 5.892 | 2.470 |
| 75  | C |  | 6.197 | 6.244 | 0.758 | 6.395 | 3.195 |
| 76  | B |  | 5.943 | 5.927 | 0.269 | 5.833 | 1.851 |
| 77  | B |  | 6.496 | 6.615 | 1.832 | 6.536 | 0.616 |
| 78  | C |  | 6.987 | 6.842 | 2.075 | 6.820 | 2.390 |
| 79  | B |  | 6.625 | 6.525 | 1.509 | 6.428 | 2.974 |
| 80* | C |  | 7.149 | 6.733 | 5.511 | 6.735 | 5.791 |
| 81* | A |  | 6.873 | 6.373 | 7.275 | 6.525 | 5.063 |

**Table S2** Free energy decomposition for key residues of Hsp90

| Residue                           | Van de Waals | Electrostatic | Polar Solvation | Non-Polar Solvation | Total   |
|-----------------------------------|--------------|---------------|-----------------|---------------------|---------|
| <b>Compound 22 / Hsp90 system</b> |              |               |                 |                     |         |
| Asn40                             | -3.9560      | -0.1595       | -0.6469         | -2.4176             | -7.1799 |
| Asp82                             | 1.4692       | -9.4740       | 2.4240          | -0.4720             | -6.0528 |
| Thr174                            | -1.2878      | -3.9953       | 1.4200          | -1.0946             | -4.9578 |
| Met87                             | -1.9696      | -1.2399       | 0.3208          | -1.4408             | -4.3295 |
| Leu37                             | -1.4122      | -2.3770       | 1.1146          | -1.1474             | -3.8219 |
| Asn95                             | -1.9529      | 0.7833        | -1.0485         | -1.4774             | -3.6956 |
| ALA44                             | -1.9280      | 0.0169        | -0.5313         | -1.2228             | -3.6651 |
| Phe127                            | -1.4753      | -0.1606       | 0.1572          | -1.1036             | -2.5824 |
| <b>Compound M7 / Hsp90 system</b> |              |               |                 |                     |         |
| Asn40                             | -3.8908      | -0.6977       | -1.4185         | -2.4626             | -8.4696 |
| Asp82                             | 1.2224       | -9.4003       | 3.0566          | -0.4364             | -5.5576 |
| Asn95                             | -2.8965      | 0.3715        | -0.9114         | -1.9558             | -5.3922 |
| Leu37                             | -2.1847      | -2.2116       | 0.5889          | -1.4828             | -5.2901 |
| Met87                             | -2.1537      | -0.5374       | 0.0833          | -1.3804             | -3.9882 |
| Thr174                            | -1.2714      | -2.2123       | 1.1989          | -0.9126             | -3.1974 |
| ALA44                             | -1.5719      | 0.1412        | -0.5469         | -1.2075             | -3.1850 |
| Phe127                            | -1.7174      | -0.4970       | 0.3757          | -0.9723             | -2.8109 |
| <b>Compound M9 / Hsp90 system</b> |              |               |                 |                     |         |



|        |         |          |         |         |         |
|--------|---------|----------|---------|---------|---------|
| Asn40  | -3.6768 | -0.7024  | -1.2136 | -2.2457 | -7.8386 |
| Asp82  | 1.5722  | -11.8732 | 4.0488  | -0.4450 | -6.6973 |
| Asn95  | -2.9049 | -0.0104  | -0.8979 | -2.0077 | -5.8209 |
| Met87  | -2.4175 | -0.6757  | 0.0919  | -1.4747 | -4.4760 |
| Leu37  | -2.1709 | -1.4959  | 0.6314  | -1.3486 | -4.3839 |
| Phe127 | -2.2039 | -0.6987  | 0.4821  | -1.3260 | -3.7465 |
| Thr174 | -1.2658 | -2.4604  | 1.2470  | -0.9764 | -3.4556 |
| ALA44  | -1.5837 | 0.1504   | -0.6350 | -1.1832 | -3.2516 |

**Table S3** SMILES format for the designed molecules

| No. | SMILES format                                                                                           |
|-----|---------------------------------------------------------------------------------------------------------|
| M1  | <chem>CC(C)CC1=CC=C(CN2C(NC3=CC(O)=CC(O)=C3C(N4CC5=NC=CC=C5C4)=O)=CC=N2)C=C1</chem>                     |
| M2  | <chem>CC(C)CC1=CC=C(CN2C(NC3=CC(O)=CC(O)=C3C(N4CC(C=NNC5)=C5C4)=O)=CC=N2)C=C1</chem>                    |
| M3  | <chem>CC(C)CC1=CC=C(CN2C(NC3=CC(O)=CC(O)=C3C(N4CC5=C(C4)NN=C5)=O)=CC=N2)C=C1</chem>                     |
| M4  | <chem>COC1=CC=C(CN2C(NC3=CC(O)=CC(O)=C3C(N4CC5=C(C=C(C=N5)O)C4)=O)=CC(C6CCCC6)=N2)C=C1</chem>           |
| M5  | <chem>COC1=CC=C(CN2C(NC3=CC(O)=CC(O)=C3C(N4CC5=C(C=C(C=N5)C(O)=O)C4)=O)=CC(C6CCCC6)=N2)C=C1</chem>      |
| M6  | <chem>COC1=CC=C(CN2C(NC3=CC(O)=CC(O)=C3C(N4CC5=C(C=C(C=N5)OC)C4)=O)=CC(C6CCCC6)=N2)C=C1</chem>          |
| M7  | <chem>COC1=CC=C(CN2C(NC3=CC(O)=CC(O)=C3C(N4C[C@@H]5[C@@H](C4)NN=C5O)=O)=CC(C6CCCC6)=N2)C=C1</chem>      |
| M8  | <chem>COC1=CC=C(CN2C(NC3=CC(O)=CC(O)=C3C(N4C[C@@H]5[C@@H](C4)NN=C5C(O)=O)=O)=CC(C6CCCC6)=N2)C=C1</chem> |

M9 COC1=CC=C(CN2C(NC3=CC(O)=CC(O)=C3C(N4C[C@@H]5[C@@H](C4)NN=C5OC)=O)=CC(C6CCCC6)=N2)C=C1

M10 COC1=CC(C2CCCC2)=C(CN3C(NC4=CC(O)=CC(O)=C4C(N5CC6=C(C5)C=NN6)=O)=CC=N3)C=C1

---
